# Supplementary material
Source: ML conference proceedings conference paper supplement (https://openreview.net/forum?id=348hfcprUs)
Supplement: supplementary_material [file attachment]

# A Simple PDF File

This is a small demonstration .pdf file -

just for use in the Virtual Mechanics tutorials. More text. And more text. And more text. And more text. And more text.

And more text. And more text. And more text. And more text. And more text. And more text. Boring, zzzzz. And more text. And more text.

And more text. And more text. And more text. And more text. And more  
text. And more text. And more text. Even more. Continued on page 2 ...
